# Supplementary material for: Jellyfish skin polysaccharides enhance intestinal barrier function and modulate the gut microbiota in mice with DSS-induced colitis
Source: Royal Society of Chemistry journal article supplement (doi:10.1039/d1fo02001c), 2021-01-01
Supplement: d1fo02001c1.pdf [file d1fo02001c1.pdf]

## Supplementary Materials

### Jellyfish skin polysaccharides enhance intestinal barrier function and modulate and gut microbiota in mice with DSS-induced colitis

#### Supplementary Figures

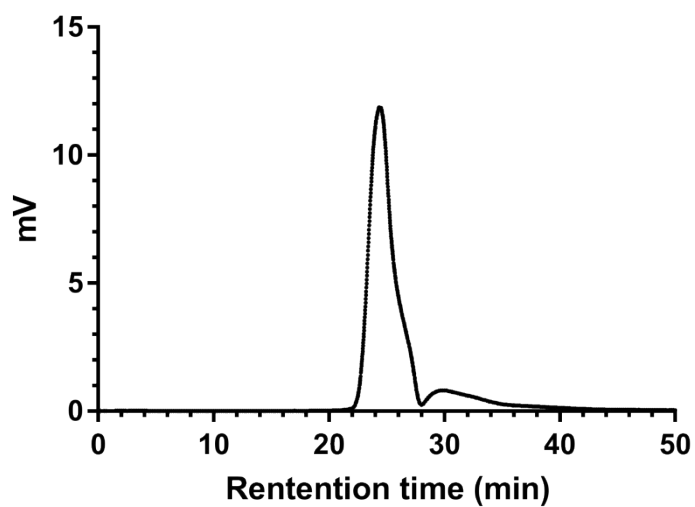

Fig. S1. High performance liquid chromatogram of JSP extracted from jellyfish skin.

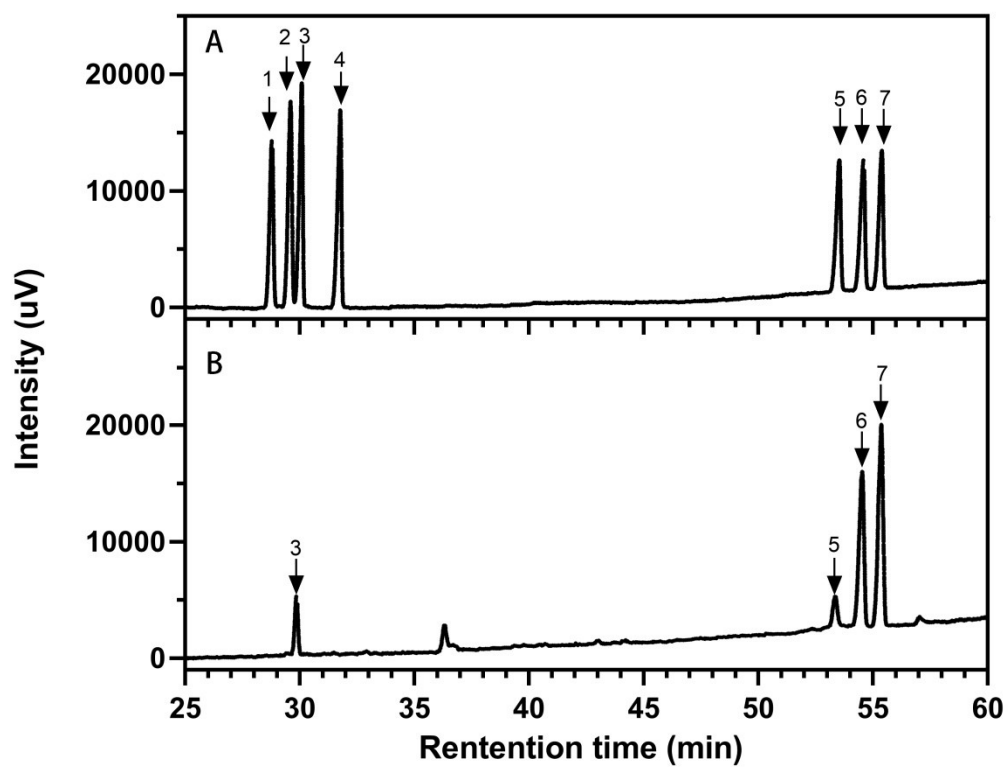

**Fig.S2 Gas chromatography profile of monosaccharide standard (A) and JSP (B). Peaks: 1 L-rhamnose, 2 L-Fucose, 3 L-arabinose, 4 D-xylose, 5 D-mannose, 6 D-glucose, 7 D-galactose**

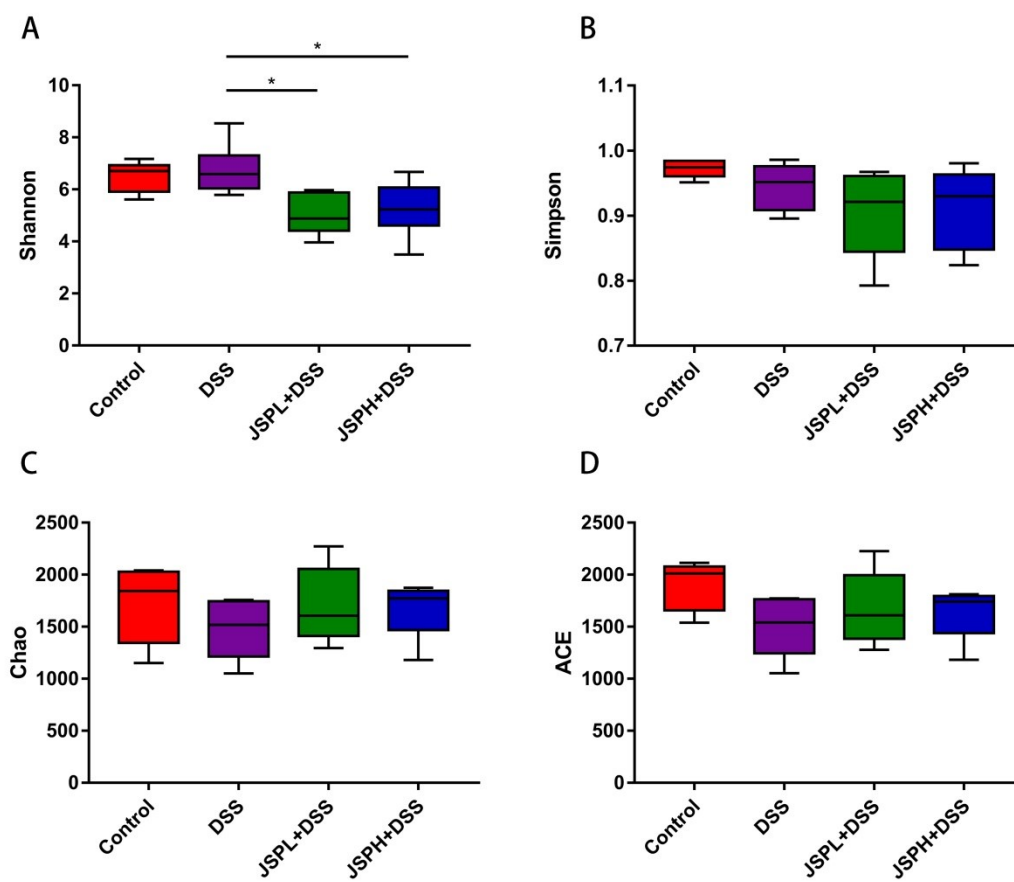

**Fig. S3. Box plot exhibiting alpha diversity indices in each group. (A) Shannon, (B) Simpson, (C) Chao, and (D) ACE. \* $p < 0.05$ , \*\* $p < 0.01$ , \*\*\* $p < 0.001$ , \*\*\*\* $p < 0.0001$  vs DSS group.**

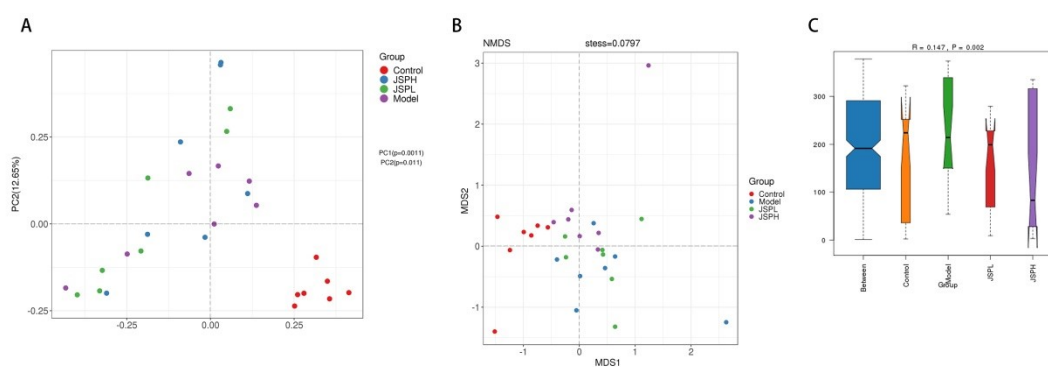

**Fig. S4. Impact of JSP on gut microbial structure in DSS-induced UC rats. (A) Principal component analysis (PCA) score plot. (B) non-metric multidimensional**

scaling (NMDS). (C) Analysis of similarities (ANOSIM).

## Supplementary Tables

**Table S1: Primer sequences used for RT-PCR experiments**

| Genes         | Gene ID | Forward primer           | Reverse primer          |
|---------------|---------|--------------------------|-------------------------|
| GAPDH         | 14433   | TGTGTCCGTCGTGGATCTGA     | TTGCTGTTGAAGTCGCAGGAG   |
| IL-6          | 16193   | CTCAGCGCTGAGTTG          | CCTGTAGCCCACGTCGTAGC    |
| TNF- $\alpha$ | 21926   | ACTGAACTTCGGGGTGATCG     | GGCTACAGGCTTGCTACTCG    |
| IL-1 $\beta$  | 16176   | GAGCACCTTCTTTTCCTTCATCTT | TCACACACCAGCAGGTTATCATC |
| Occludin      | 18260   | GGCAAGCGATCATACCCAGAG    | AGGCTGCCTGAAGTCATCCAC   |
| ZO-1          | 21872   | GACCAATAGCTGATGTTGCCAGAG | TATGAAGGCGAATGATGCCAGA  |
| Muc2          | 17831   | TCATGACGTCTGGTGAATGG     | AGCTTGTCGTGGCAGCTTGA    |
| E-cadherin    | 12550   | GCCAATCCTGATGAAATTGGAAAC | CCACTGCCCTCGTAATCGAAC   |
| Tff3          | 21786   | TGCTGCCATGGAGACCAGAG     | GACATTTGCCGGCACCATAC    |

**Table S2: List of antibodies**

| Name of Antibody        | Catalog number | Concentration | Company                   |
|-------------------------|----------------|---------------|---------------------------|
| NF- $\kappa$ B/p65      | #8242          | 1:1000        | Cell Signaling Technology |
| p-NF- $\kappa$ B/p65    | #3033          | 1:1000        | Cell Signaling Technology |
| I $\kappa$ B $\alpha$   | #4814          | 1:1000        | Cell Signaling Technology |
| p-I $\kappa$ B $\alpha$ | #2859          | 1:1000        | Cell Signaling Technology |

|                             |                   |                   |                                  |
|-----------------------------|-------------------|-------------------|----------------------------------|
| <b>β-actin</b>              | <b>4970</b>       | <b>WB: 1:1000</b> | <b>Cell Signaling Technology</b> |
| <b>Occludin</b>             | <b>27260-1-AP</b> | <b>IF: 1:300</b>  | <b>Proteintech Group</b>         |
|                             |                   | <b>WB: 1:1000</b> |                                  |
| <b>ZO-1</b>                 | <b>A0659</b>      | <b>WB: 1:500</b>  | <b>ABclonal Technology</b>       |
| <b>Muc2</b>                 | <b>27675-1-AP</b> | <b>IF: 1:1000</b> | <b>Proteintech Group</b>         |
| <b>ZO-1</b>                 | <b>Ab221547</b>   | <b>IF: 1:100</b>  | <b>Abcam plc</b>                 |
| <b>Goat Anti-Rabbit IgG</b> | <b>Ab150077</b>   | <b>IF: 1:400</b>  | <b>Abcam plc</b>                 |

**H&L (Alexa Fluor ® 488)**

---
